# Supplementary material
Source: publisher figshare collection journal article supplement (https://asha.figshare.com/articles/dataset/_/16435599)
Supplement: Supplementary file 2 [file 1]

**Supplemental Table S5.** Summary of generalized linear mixed-effects models with both target (happiness and sadness) and filler (anger and neutrality) trials in Experiment 1 (pairwise contrasts are indented).

| Parameter                  | Effects                                               |                                                          |
|----------------------------|-------------------------------------------------------|----------------------------------------------------------|
|                            | Accuracy                                              | Reaction time                                            |
| <b>Gender</b>              | $\chi^2(1) = 7.07, p = .008$                          | $\chi^2(1) = .01, p = .906, w = 0.01$                    |
| female vs. male            | $\hat{\beta}_1 = .37, SE = .14, z = 2.71, p = .007$   | $\hat{\beta}_1 = .004, SE = .04, z = .12, p = .906$      |
| <b>Task</b>                | $\chi^2(2) = 33.18, p < .001, w = .65$                | $\chi^2(2) = 1687.59, p < .001, w = 4.65$                |
| facial vs. prosodic        | $\hat{\beta}_2 = .55, SE = .10, z = 5.60, p < .0001$  | $\hat{\beta}_2 = -.24, SE = .01, z = -.34.90, p < .0001$ |
| facial vs. semantic        | $\hat{\beta}_2 = .44, SE = .10, z = 4.40, p < .0001$  | $\hat{\beta}_2 = -.26, SE = .01, z = -38.68, p < .0001$  |
| prosodic vs. semantic      | $\hat{\beta}_2 = -.11, SE = .09, z = -1.25, p = .423$ | $\hat{\beta}_2 = -.03, SE = .01, z = -3.88, p = .0003$   |
| <b>Gender * Task</b>       | $\chi^2(2) = .38, p = .824, w = .07$                  | $\chi^2(2) = 1.68, p = .431, w = .14$                    |
| facial (female vs. male)   | $\hat{\beta}_3 = .31, SE = .19, z = 1.62, p = .106$   | $\hat{\beta}_3 = -.005, SE = .04, z = -.11, p = .913$    |
| prosodic (female vs. male) | $\hat{\beta}_3 = .35, SE = .17, z = 2.11, p = .035$   | $\hat{\beta}_3 = .004, SE = .04, z = .11, p = .916$      |
| semantic (female vs. male) | $\hat{\beta}_3 = .43, SE = .17, z = 2.52, p = .012$   | $\hat{\beta}_3 = .01, SE = .38, z = .36, p = .720$       |

*Note.* Gender and task were entered as the fixed effects, and accuracy and reaction time were entered as the dependent variable respectively. The female participants and the facial task were used as the default level of gender and task respectively. When conducting a pairwise comparison between prosodic and semantic tasks, prosody was set as the baseline level.
