# Supplementary material
Source: publisher figshare collection journal article supplement (https://asha.figshare.com/articles/dataset/_/16435599)
Supplement: Supplementary file 3 [file 1]

**Supplemental Table S1.** Words for semantic stimuli in Experiment 1.

| <b>Emotional semantics</b><br><b>Speaker</b> | <b>Anger</b>        | <b>Happiness</b>    | <b>Sadness</b>       | <b>Neutrality</b>   |
|----------------------------------------------|---------------------|---------------------|----------------------|---------------------|
| 2 male speakers                              | 发怒<br>(angry)       | 兴奋<br>(excited)     | 悲哀<br>(mournful)     | 平常<br>(usual)       |
|                                              | 痛恨<br>(resentful)   | 开心<br>(happy)       | 伤心<br>(sad)          | 平凡<br>(ordinary)    |
|                                              | 大怒<br>(wrathful)    | 悠闲<br>(leisure)     | 压抑<br>(repressed)    | 日常<br>(daily)       |
|                                              | 残暴<br>(cruel)       | 愉快<br>(pleased)     | 失落<br>(downcast)     | 普通<br>(plain)       |
|                                              | 凶狠<br>(malevolent)  | 喜悦<br>(delightful)  | 悲苦<br>(sorrowful)    | 一般<br>(common)      |
|                                              | 生气<br>(angry)       | 欢乐<br>(joyful)      | 悲痛<br>(sorrowful)    | 通俗<br>(popular)     |
|                                              | 气愤<br>(irritated)   | 欢快<br>(cheerful)    | 苦闷<br>(doleful)      | 平淡<br>(plain)       |
|                                              | 恼火<br>(exasperated) | 满意<br>(contented)   | 沮丧<br>(upset)        | 通常<br>(general)     |
| 2 female speakers                            | 恼怒<br>(annoyed)     | 安康<br>(sound)       | 哀愁<br>(grieved)      | 适度<br>(appropriate) |
|                                              | 狂怒<br>(furious)     | 安宁<br>(peaceful)    | 凄凉<br>(dismal)       | 适中<br>(moderate)    |
|                                              | 愤懑<br>(sulky)       | 欢喜<br>(delighted)   | 沉痛<br>(heavyhearted) | 平时<br>(normal)      |
|                                              | 怨恨<br>(resented)    | 融洽<br>(harmonious)  | 绝望<br>(desperate)    | 平均<br>(average)     |
|                                              | 暴怒<br>(outraged)    | 有趣<br>(interesting) | 心痛<br>(heart-broken) | 平等<br>(equal)       |
|                                              | 暴躁<br>(irritable)   | 舒畅<br>(carefree)    | 阴暗<br>(gloomy)       | 平缓<br>(mild)        |
|                                              | 愤恨<br>(spiteful)    | 高兴<br>(glad)        | 苦涩<br>(bitter)       | 固定<br>(fix)         |
| 愤怒<br>(indignant)                            | 快乐<br>(merry)       | 郁闷<br>(depressed)   | 均衡<br>(balanced)     |                     |

*Note.* 64 disyllabic words with four different emotional semantics (i.e., anger, happiness, sadness, and neutrality) were enunciated in neutral prosody respectively by four speakers (two females), yielding eight items per category of emotional semantics for female or male speakers.
