# Supplementary material
Source: publisher figshare collection journal article supplement (https://asha.figshare.com/articles/dataset/_/16435599)
Supplement: Supplementary file 4 [file 1]

**Supplemental Table S3.** Generalized linear mixed-effects model with gender and task as the fixed effects, and accuracy as the dependent variable for target emotions (happiness and sadness) in Experiment 1 (pairwise contrasts are indented).

| Parameter                  | Estimate | Standard error (SE) | z ratio | p       | Cohen's <i>d</i> [95% CI] |
|----------------------------|----------|---------------------|---------|---------|---------------------------|
| <b>Gender</b>              |          |                     |         |         |                           |
| female vs. male            | 0.41     | 0.16                | 2.58    | .010    | 0.28 [0.07, 0.48]         |
| <b>Task</b>                |          |                     |         |         |                           |
| facial vs. prosodic        | 1.05     | 0.15                | 7.13    | < .0001 | 0.76 [0.55, 0.97]         |
| facial vs. semantic        | 1.17     | 0.15                | 7.63    | < .0001 | 0.81 [0.60, 1.02]         |
| prosodic vs. semantic      | 0.12     | 0.14                | 0.90    | .638    | 0.10 [-0.11, 0.30]        |
| <b>Gender * Task</b>       |          |                     |         |         |                           |
| facial (female vs. male)   | 0.39     | 0.23                | 1.66    | .100    | 0.18 [-0.03, 0.39]        |
| prosodic (female vs. male) | 0.56     | 0.20                | 2.83    | .005    | 0.30 [0.09, 0.51]         |
| semantic (female vs. male) | 0.26     | 0.20                | 1.30    | .194    | 0.14 [-0.07, 0.35]        |

*Note.* The female participants and the facial task were used as the default level of gender and task respectively. When conducting a pairwise comparison between prosodic and semantic tasks, prosody was set as the baseline level.
