# Supplementary material
Source: publisher figshare collection journal article supplement (https://asha.figshare.com/articles/dataset/_/16435599)
Supplement: Supplementary file 5 [file 1]

**Supplemental Table S4.** Generalized linear mixed-effects model with gender and task as the fixed effects, and reaction time as the dependent variable for target emotions (happiness and sadness) in Experiment 1 (pairwise contrasts are indented).

| Parameter                  | Estimate | Standard error (SE) | z ratio | p       | Cohen's d [95% CI]   |
|----------------------------|----------|---------------------|---------|---------|----------------------|
| <b>Gender</b>              |          |                     |         |         |                      |
| female vs. male            | 0.003    | 0.04                | 0.08    | .935    | 0.01 [-0.20, 0.22]   |
| <b>Task</b>                |          |                     |         |         |                      |
| facial vs. prosodic        | -0.30    | 0.01                | -25.40  | < .0001 | -2.71 [-2.92, -2.50] |
| facial vs. semantic        | -0.39    | 0.01                | -32.83  | < .0001 | -3.50 [-3.71, -3.29] |
| prosodic vs. semantic      | -0.09    | 0.01                | -6.79   | < .0001 | -0.72 [-0.93, -0.51] |
| <b>Gender * Task</b>       |          |                     |         |         |                      |
| facial (female vs. male)   | 0.003    | 0.04                | 0.08    | .937    | 0.01 [-0.20, 0.22]   |
| prosodic (female vs. male) | -0.006   | 0.04                | -0.16   | .871    | -0.02 [-0.23, 0.19]  |
| semantic (female vs. male) | 0.01     | 0.04                | 0.31    | .755    | 0.03 [-0.18, 0.24]   |

*Note.* The female participants and the facial task were used as the default level of gender and task respectively. When conducting a pairwise comparison between prosodic and semantic tasks, prosody was set as the baseline level.
