# Supplementary material
Source: publisher figshare collection journal article supplement (https://asha.figshare.com/articles/dataset/_/16435599)
Supplement: Supplementary file 6 [file 1]

**Supplemental Table S11.** Summary of within-participant analyses in Experiment 2 and 3.

| <b>Gender</b> | <b>Task</b> | <b>Congruence1</b><br>(prosody vs. semantics) | <b>Congruence2</b><br>(face) | <b>Accuracy</b>           | <b>Reaction time</b>      |
|---------------|-------------|-----------------------------------------------|------------------------------|---------------------------|---------------------------|
| female        | prosody     | congruent                                     | cross-channel congruent      | $t(40) = -.81, p = .421$  | $t(40) = -.72, p = .477$  |
| male          | prosody     | congruent                                     | cross-channel congruent      | $t(36) = .18, p = .856$   | $t(36) = .61, p = .542$   |
| female        | semantics   | congruent                                     | cross-channel congruent      | $t(40) = .50, p = .623$   | $t(40) = -.34, p = .737$  |
| male          | semantics   | congruent                                     | cross-channel congruent      | $t(36) = -.77, p = .446$  | $t(36) = -.09, p = .931$  |
| female        | prosody     | congruent                                     | facial incongruent           | $t(40) = .22, p = .830$   | $t(40) = -1.32, p = .195$ |
| male          | prosody     | congruent                                     | facial incongruent           | $t(36) = -1.82, p = .078$ | $t(36) = -.47, p = .640$  |
| female        | semantics   | congruent                                     | facial incongruent           | $t(40) = -.21, p = .838$  | $t(40) = -2.06, p = .046$ |
| male          | semantics   | congruent                                     | facial incongruent           | $t(36) = -.19, p = .850$  | $t(36) = -.11, p = .910$  |
| female        | prosody     | incongruent                                   | prosodic incongruent         | $t(40) = 2.23, p = .027$  | $t(40) = .13, p = .894$   |
| male          | prosody     | incongruent                                   | prosodic incongruent         | $t(36) = -.42, p = .680$  | $t(36) = -.29, p = .774$  |
| female        | semantics   | incongruent                                   | prosodic incongruent         | $t(40) = 1.07, p = .291$  | $t(40) = -.69, p = .496$  |
| male          | semantics   | incongruent                                   | prosodic incongruent         | $t(36) = -.28, p = .782$  | $t(36) = .60, p = .551$   |
| female        | prosody     | incongruent                                   | semantic incongruent         | $t(40) = -1.03, p = .309$ | $t(40) = -.56, p = .576$  |
| male          | prosody     | incongruent                                   | semantic incongruent         | $t(36) = -3.31, p = .002$ | $t(36) = -.51, p = .611$  |
| female        | semantics   | incongruent                                   | semantic incongruent         | $t(40) = .71, p = .480$   | $t(40) = -.37, p = .712$  |
| male          | semantics   | incongruent                                   | semantic incongruent         | $t(36) = -.19, p = .850$  | $t(36) = .72, p = .477$   |
