# Supplementary material
Source: publisher figshare collection journal article supplement (https://asha.figshare.com/articles/dataset/_/16435599)
Supplement: Supplementary file 7 [file 1]

**Supplemental Table S2.** Words for prosodic stimuli in Experiment 1.

|                   |                 |               |                   |
|-------------------|-----------------|---------------|-------------------|
| 咖啡<br>(coffee)    | 台灯<br>(lamp)    | 水杯<br>(cup)   | 面包<br>(bread)     |
| 蜻蜓<br>(dragonfly) | 河流<br>(river)   | 火柴<br>(match) | 树林<br>(woods)     |
| 斑马<br>(zebra)     | 毛毯<br>(blanket) | 粉笔<br>(chalk) | 报纸<br>(newspaper) |
| 风扇<br>(fan)       | 肥皂<br>(soap)    | 手套<br>(glove) | 大象<br>(elephant)  |

*Note.* All 16 disyllabic words with neutral emotional semantics were enunciated in angry, happy, neutral, and sad emotional prosody respectively by four speakers (2 females), yielding eight items per category of emotional prosody for female or male speakers.
