# Supplementary material
Source: publisher figshare collection journal article supplement (https://asha.figshare.com/articles/dataset/_/16435599)
Supplement: Supplementary file 8 [file 1]

**Supplemental Table S7.** Generalized linear mixed-effects model with gender, task, and congruence as the fixed effects, and accuracy as the dependent variable in Experiment 2 (pairwise contrasts are indented).

| <b>Parameter</b>                        | <b>Estimate</b> | <b>Standard error (SE)</b> | <b>z ratio</b> | <b>p</b> | <b>Cohen’s d [95% CI]</b> |
|-----------------------------------------|-----------------|----------------------------|----------------|----------|---------------------------|
| <b>Gender</b>                           |                 |                            |                |          |                           |
| female vs. male                         | 0.40            | 0.18                       | 2.20           | .028     | 0.25 [0.03, 0.47]         |
| <b>Task</b>                             |                 |                            |                |          |                           |
| prosodic vs. semantic                   | 0.04            | 0.22                       | 0.18           | .855     | 0.02 [-0.20, 0.24]        |
| <b>Congruence</b>                       |                 |                            |                |          |                           |
| congruent vs. incongruent               | 1.09            | 0.18                       | 6.02           | < .0001  | 0.68 [0.46, 0.90]         |
| <b>Gender * Task</b>                    |                 |                            |                |          |                           |
| prosodic (female vs. male)              | 0.80            | 0.22                       | 3.60           | .0003    | 0.41 [0.19, 0.63]         |
| semantic (female vs. male)              | 0.04            | 0.21                       | 0.19           | .849     | 0.02 [-0.20, 0.24]        |
| <b>Task * Congruence</b>                |                 |                            |                |          |                           |
| congruent (prosodic vs. semantic)       | 0.86            | 0.25                       | 3.43           | .001     | 0.39 [0.17, 0.61]         |
| incongruent (prosodic vs. semantic)     | 1.33            | 0.26                       | 5.23           | < .0001  | 0.59 [0.37, 0.81]         |
| <b>Gender * Congruence</b>              |                 |                            |                |          |                           |
| congruent (female vs. male)             | 0.34            | 0.26                       | 1.32           | .189     | 0.15 [-0.07, 0.37]        |
| incongruent (female vs. male)           | 0.46            | 0.20                       | 2.28           | .023     | 0.26 [0.04, 0.48]         |
| <b>Gender * Task * Congruence</b>       |                 |                            |                |          |                           |
| congruent, prosodic (female vs. male)   | 0.70            | 0.33                       | 2.14           | .032     | 0.24 [0.02, 0.46]         |
| incongruent, prosodic (female vs. male) | 0.85            | 0.26                       | 3.34           | .001     | 0.38 [0.16, 0.60]         |
| congruent, semantic (female vs. male)   | -0.01           | 0.35                       | -0.03          | .975     | -0.003 [-0.23, 0.22]      |
| incongruent, semantic (female vs. male) | 0.06            | 0.23                       | 0.25           | .799     | 0.03 [-0.19, 0.25]        |

*Note.* The female participants, the prosodic task, and the congruent stimuli were used as the default level of gender, task, and congruence respectively.
