# Supplementary material
Source: publisher figshare collection journal article supplement (https://asha.figshare.com/articles/dataset/_/16435599)
Supplement: Supplementary file 9 [file 1]

**Supplemental Table S10.** Generalized linear mixed effects model with gender, task, and congruence as the fixed effects, and reaction time as the dependent variable in Experiment 3 (pairwise contrasts are indented).

| Parameter                                                   | Estimate | Standard error (SE) | z ratio | p       | Cohen's <i>d</i><br>[95% CI] |
|-------------------------------------------------------------|----------|---------------------|---------|---------|------------------------------|
| <b>Gender</b>                                               |          |                     |         |         |                              |
| female vs. male                                             | -0.11    | 0.06                | -1.64   | .100    | -0.19 [-0.41, 0.04]          |
| <b>Task</b>                                                 |          |                     |         |         |                              |
| facial vs. prosodic                                         | -0.26    | 0.03                | -9.14   | < .0001 | -1.03 [-1.26, -0.81]         |
| facial vs. semantic                                         | -0.33    | 0.03                | -11.54  | < .0001 | -1.31 [-1.53, -1.08]         |
| prosodic vs. semantic                                       | -0.06    | 0.03                | -2.41   | .042    | -0.27 [-0.49, -0.05]         |
| <b>Congruence</b>                                           |          |                     |         |         |                              |
| cross-channel congruent vs. semantic incongruent            | -0.13    | 0.02                | -4.61   | < .0001 | -0.52 [-0.74, -0.30]         |
| cross-channel congruent vs. prosodic incongruent            | -0.11    | 0.02                | -3.88   | .001    | -0.44 [-0.66, -0.22]         |
| cross-channel congruent vs. facial incongruent              | -0.05    | 0.02                | -1.83   | .261    | -0.21 [-0.43, 0.01]          |
| <b>Gender * Task</b>                                        |          |                     |         |         |                              |
| facial (female vs. male)                                    | -0.15    | 0.06                | -2.31   | .021    | -0.26 [-0.48, -0.04]         |
| prosodic (female vs. male)                                  | -0.14    | 0.06                | -2.08   | .037    | -0.24 [-0.46, -0.01]         |
| semantic (female vs. male)                                  | -0.02    | 0.06                | -0.36   | .717    | -0.04 [-0.26, 0.18]          |
| <b>Task * Congruence</b>                                    |          |                     |         |         |                              |
| facial (cross-channel congruent vs. semantic incongruent)   | -0.09    | 0.05                | -1.87   | .242    | -0.21 [-0.43, 0.01]          |
| facial (cross-channel congruent vs. prosodic incongruent)   | -0.06    | 0.05                | -1.34   | .536    | -0.15 [-0.37, 0.07]          |
| facial (cross-channel congruent vs. facial incongruent)     | -0.03    | 0.05                | -0.84   | .836    | -0.10 [-0.32, 0.13]          |
| prosodic (cross-channel congruent vs. semantic incongruent) | -0.14    | 0.05                | -3.03   | .013    | -0.34 [-0.57, -0.12]         |
| prosodic (cross-channel congruent vs. prosodic incongruent) | -0.15    | 0.05                | -3.28   | .006    | -0.37 [-0.59, -0.15]         |
| prosodic (cross-channel congruent vs. facial incongruent)   | -0.10    | 0.05                | -2.08   | .160    | -0.24 [-0.46, -0.01]         |
| semantic (cross-channel congruent vs. semantic incongruent) | -0.16    | 0.05                | -3.38   | .004    | -0.38 [-0.60, -0.16]         |
| semantic (cross-channel congruent vs. prosodic incongruent) | -0.11    | 0.05                | -2.37   | .082    | -0.27 [-0.49, -0.05]         |
| semantic (cross-channel congruent vs. facial incongruent)   | -0.02    | 0.05                | -0.37   | .982    | -0.04 [-0.26, 0.18]          |
| <b>Gender * Congruence</b>                                  |          |                     |         |         |                              |
| cross-channel congruent (female vs. male)                   | -0.10    | 0.07                | -1.50   | .134    | -0.17 [-0.39, 0.05]          |
| semantic incongruent (female vs. male)                      | -0.12    | 0.07                | -1.80   | .072    | -0.20 [-0.43, 0.02]          |
| prosodic incongruent (female vs. male)                      | -0.08    | 0.07                | -1.24   | .217    | -0.14 [-0.36, 0.08]          |
| facial incongruent (female vs. male)                        | -0.11    | 0.07                | -1.74   | .082    | -0.20 [-0.42, 0.02]          |
| <b>Gender * Task * Congruence</b>                           |          |                     |         |         |                              |
| facial, cross-channel congruent (female vs. male)           | -0.11    | 0.06                | -1.62   | .105    | -0.18 [-0.41, 0.04]          |
| facial, semantic incongruent (female vs. male)              | -0.21    | 0.06                | -3.01   | .003    | -0.34 [-0.56, -0.12]         |
| facial, prosodic incongruent (female vs. male)              | -0.12    | 0.06                | -1.78   | .075    | -0.20 [-0.42, 0.02]          |
| facial, facial incongruent (female vs. male)                | -0.15    | 0.06                | -2.20   | .028    | -0.25 [-0.47, -0.03]         |
| prosodic, cross-channel congruent (female vs. male)         | -0.14    | 0.06                | -1.97   | .049    | -0.22 [-0.44, 0.00]          |
| prosodic, semantic incongruent (female vs. male)            | -0.14    | 0.06                | -2.02   | .043    | -0.23 [-0.45, -0.01]         |

---

|                                                     |       |      |       |      |                      |
|-----------------------------------------------------|-------|------|-------|------|----------------------|
| prosodic, prosodic incongruent (female vs. male)    | -0.11 | 0.06 | -1.58 | .114 | -0.18 [-0.40, 0.04]  |
| prosodic, facial incongruent (female vs. male)      | -0.15 | 0.06 | -2.11 | .035 | -0.24 [-0.46, -0.02] |
| semantic, cross-channel congruent (female vs. male) | -0.04 | 0.06 | -0.63 | .527 | -0.07 [-0.29, 0.15]  |
| semantic, semantic incongruent (female vs. male)    | 0.001 | 0.06 | 0.03  | .980 | 0.003 [-0.22, 0.23]  |
| semantic, prosodic incongruent (female vs. male)    | -0.01 | 0.06 | -0.11 | .911 | -0.01 [-0.23, 0.21]  |
| semantic, facial incongruent (female vs. male)      | -0.04 | 0.06 | -0.57 | .569 | -0.06 [-0.29, 0.16]  |

---

*Note.* The female participants, the facial task, and the cross-channel congruent condition were used as the default level of gender, task, and congruence respectively. When conducting a pairwise comparison between prosodic and semantic tasks, prosody was set as the baseline level.
