# Supplementary material
Source: publisher figshare collection journal article supplement (https://asha.figshare.com/articles/dataset/_/16435599)
Supplement: Supplementary file 10 [file 1]

**Supplemental Table S6.** Spoken stimuli adopted in Experiments 2 and 3.

|                            |       | <b>Emotional prosody</b> |                      |                      |                    |
|----------------------------|-------|--------------------------|----------------------|----------------------|--------------------|
|                            |       | <b>Happy</b>             |                      | <b>Sad</b>           |                    |
|                            |       | 3 Male speakers          | 3 Female speakers    | 3 Male speakers      | 3 Female speakers  |
| <b>Emotional semantics</b> | Happy | 有趣<br>(interesting)      | 开心<br>(happy)        | 安康<br>(sound)        | 欢喜<br>(joyful)     |
|                            |       | 融洽<br>(harmonious)       | 快乐<br>(pleased)      | 得意<br>(elated)       | 知足<br>(contented)  |
|                            |       | 喜悦<br>(delightful)       | 高兴<br>(glad)         | 舒适<br>(comfortable)  | 安宁<br>(peaceful)   |
|                            |       | 舒畅<br>(carefree)         | 愉快<br>(cheerful)     | 热切<br>(cordial)      | 如愿<br>(gratified)  |
|                            | Sad   | 伤心<br>(sad)              | 伤感<br>(melancholic)  | 悲痛<br>(sorrowful)    | 阴暗<br>(gloomy)     |
|                            |       | 压抑<br>(repressed)        | 失落<br>(disappointed) | 消沉<br>(low-spirited) | 难过<br>(upset)      |
|                            |       | 悲哀<br>(mournful)         | 哀愁<br>(grieved)      | 苦涩<br>(bitter)       | 黯淡<br>(downcast)   |
|                            |       | 凄凉<br>(dismal)           | 心痛<br>(heart-broken) | 苦闷<br>(sulky)        | 抑郁<br>(depressive) |

*Note.* 16 words with happy and sad emotional semantics were enunciated with a congruent or incongruent emotional prosody by six speakers (three females), yielding eight items per congruence condition (congruent vs. incongruent) for male or female speakers in Experiment 2 and four items per congruence condition (cross-channel congruent, facial incongruent, prosodic incongruent and semantic incongruent) for male or female speakers in Experiment 3.
