# Supplementary material
Source: publisher figshare collection journal article supplement (https://asha.figshare.com/articles/dataset/_/16435599)
Supplement: Supplementary file 11 [file 1]

**Supplemental Table S8.** Generalized linear mixed-effects model with gender, task, and congruence as the fixed effects, and reaction time as the dependent variable in Experiment 2 (pairwise contrasts are indented).

| <b>Parameter</b>                        | <b>Estimate</b> | <b>Standard error (SE)</b> | <b>z ratio</b> | <b>p</b> | <b>Cohen’s d [95% CI]</b> |
|-----------------------------------------|-----------------|----------------------------|----------------|----------|---------------------------|
| <b>Gender</b>                           |                 |                            |                |          |                           |
| female vs. male                         | -0.02           | 0.06                       | -0.36          | .720     | -0.04 [-0.26, 0.18]       |
| <b>Task</b>                             |                 |                            |                |          |                           |
| prosodic vs. semantic                   | -0.08           | 0.03                       | -2.60          | .009     | -0.29 [-0.52, -0.07]      |
| <b>Congruence</b>                       |                 |                            |                |          |                           |
| congruent vs. incongruent               | -0.14           | 0.02                       | -6.27          | < .0001  | -0.71 [-0.93, -0.49]      |
| <b>Gender * Task</b>                    |                 |                            |                |          |                           |
| prosodic (female vs. male)              | -0.03           | 0.06                       | -0.44          | .658     | -0.05 [-0.27, 0.17]       |
| semantic (female vs. male)              | -0.01           | 0.06                       | -0.24          | .808     | -0.03 [-0.25, 0.19]       |
| <b>Task * Congruence</b>                |                 |                            |                |          |                           |
| congruent (prosodic vs. semantic)       | -0.12           | 0.03                       | -3.84          | .0001    | -0.43 [-0.66, -0.21]      |
| incongruent (prosodic vs. semantic)     | -0.16           | 0.03                       | -5.13          | < .0001  | -0.58 [-0.80, -0.36]      |
| <b>Gender * Congruence</b>              |                 |                            |                |          |                           |
| congruent (female vs. male)             | -0.03           | 0.06                       | -0.57          | .571     | -0.06 [-0.29, 0.16]       |
| incongruent (female vs. male)           | -0.01           | 0.06                       | -0.11          | .914     | -0.01 [-0.23, 0.21]       |
| <b>Gender * Task * Congruence</b>       |                 |                            |                |          |                           |
| congruent, prosodic (female vs. male)   | -0.05           | 0.06                       | -0.81          | .419     | -0.09 [-0.31, 0.13]       |
| incongruent, prosodic (female vs. male) | -0.002          | 0.06                       | -0.04          | 1.000    | -0.005 [-0.23, 0.22]      |
| congruent, semantic (female vs. male)   | -0.02           | 0.06                       | -0.30          | .763     | -0.03 [-0.26, 0.19]       |
| incongruent, semantic (female vs. male) | -0.01           | 0.06                       | -0.18          | .860     | -0.02 [-0.24, 0.20]       |

*Note.* The female participants, the prosodic task, and the congruent stimuli were used as the default level of gender, task, and congruence respectively.
