# Supplementary material
Source: publisher figshare collection journal article supplement (https://asha.figshare.com/articles/dataset/_/16435599)
Supplement: Supplementary file 12 [file 1]

**Supplemental Table S9.** Generalized linear mixed-effects model with gender, task, and congruence as the fixed effects, and accuracy as the dependent variable in Experiment 3 (pairwise contrasts are indented).

| Parameter                                                   | Estimate | Standard error (SE) | z ratio | p       | Cohen's d [95% CI]  |
|-------------------------------------------------------------|----------|---------------------|---------|---------|---------------------|
| <b>Gender</b>                                               |          |                     |         |         |                     |
| female vs. male                                             | -0.11    | 0.16                | -0.72   | .471    | -0.08 [-0.30, 0.14] |
| <b>Task</b>                                                 |          |                     |         |         |                     |
| facial vs. prosodic                                         | 0.31     | 0.25                | 1.25    | .425    | 0.14 [-0.08, 0.36]  |
| facial vs. semantic                                         | 0.67     | 0.24                | 2.77    | .016    | 0.31 [0.09, 0.54]   |
| prosodic vs. semantic                                       | 0.36     | 0.24                | 1.53    | .279    | 0.17 [-0.05, 0.40]  |
| <b>Congruence</b>                                           |          |                     |         |         |                     |
| cross-channel congruent vs. semantic incongruent            | 1.01     | 0.25                | 4.01    | .0003   | 0.45 [0.23, 0.68]   |
| cross-channel congruent vs. prosodic incongruent            | 1.24     | 0.25                | 5.00    | < .0001 | 0.57 [0.34, 0.79]   |
| cross-channel congruent vs. facial incongruent              | 0.40     | 0.27                | 1.52    | .423    | 0.17 [-0.05, 0.39]  |
| <b>Gender * Task</b>                                        |          |                     |         |         |                     |
| facial (female vs. male)                                    | 0.07     | 0.24                | 0.26    | .776    | 0.03 [-0.19, 0.25]  |
| prosodic (female vs. male)                                  | -0.43    | 0.22                | -1.93   | .054    | -0.22 [-0.44, 0.00] |
| semantic (female vs. male)                                  | 0.01     | 0.20                | 0.07    | .053    | 0.008[-0.21, 0.23]  |
| <b>Task * Congruence</b>                                    |          |                     |         |         |                     |
| facial (cross-channel congruent vs. semantic incongruent)   | 0.39     | 0.39                | 1.00    | .751    | 0.11 [-0.11, 0.34]  |
| facial (cross-channel congruent vs. prosodic incongruent)   | 0.11     | 0.41                | 0.27    | .993    | 0.03 [-0.19, 0.25]  |
| facial (cross-channel congruent vs. facial incongruent)     | 0.42     | 0.39                | 1.07    | .707    | 0.12 [-0.10, 0.34]  |
| prosodic (cross-channel congruent vs. semantic incongruent) | 0.67     | 0.41                | 1.63    | .360    | 0.18 [-0.04, 0.41]  |
| prosodic (cross-channel congruent vs. prosodic incongruent) | 1.61     | 0.39                | 4.16    | .0002   | 0.47 [0.25, 0.69]   |
| prosodic (cross-channel congruent vs. facial incongruent)   | 0.55     | 0.42                | 1.31    | .559    | 0.15 [-0.07, 0.37]  |
| semantic (cross-channel congruent vs. semantic incongruent) | 1.82     | 0.38                | 4.75    | < .0001 | 0.54 [0.32, 0.76]   |
| semantic (cross-channel congruent vs. prosodic incongruent) | 1.75     | 0.39                | 4.55    | < .0001 | 0.52 [0.29, 0.74]   |
| semantic (cross-channel congruent vs. facial incongruent)   | 0.29     | 0.43                | 0.66    | .911    | 0.07 [-0.15, 0.30]  |
| <b>Gender * Congruence</b>                                  |          |                     |         |         |                     |
| cross-channel congruent (female vs. male)                   | 0.28     | 0.32                | 0.88    | .378    | 0.10 [-0.12, 0.32]  |
| semantic incongruent (female vs. male)                      | -0.20    | 0.23                | -0.89   | .372    | -0.10 [-0.32, 0.12] |
| prosodic incongruent (female vs. male)                      | -0.19    | 0.22                | -0.87   | .386    | -0.10 [-0.32, 0.12] |
| facial incongruent (female vs. male)                        | -0.12    | 0.27                | -0.43   | .668    | -0.05 [-0.27, 0.17] |
| <b>Gender * Task * Congruence</b>                           |          |                     |         |         |                     |
| facial, cross-channel congruent (female vs. male)           | 0.34     | 0.48                | 0.71    | .477    | 0.08 [-0.14, 0.30]  |
| facial, semantic incongruent (female vs. male)              | -0.20    | 0.40                | -0.49   | .628    | -0.06 [-0.28, 0.17] |
| facial, prosodic incongruent (female vs. male)              | -0.10    | 0.46                | -0.21   | .831    | -0.02 [-0.25, 0.20] |
| facial, facial incongruent (female vs. male)                | 0.27     | 0.40                | 0.67    | .503    | 0.08 [-0.15, 0.30]  |
| prosodic, cross-channel congruent (female vs. male)         | 0.11     | 0.54                | 0.20    | .838    | 0.02 [-0.20, 0.24]  |
| prosodic, semantic incongruent (female vs. male)            | -0.45    | 0.42                | -1.08   | .278    | -0.12 [-0.34, 0.10] |

---

|                                                     |       |      |       |      |                      |
|-----------------------------------------------------|-------|------|-------|------|----------------------|
| prosodic, prosodic incongruent (female vs. male)    | -0.41 | 0.30 | -1.37 | .171 | -0.16 [-0.38, 0.07]  |
| prosodic, facial incongruent (female vs. male)      | -0.76 | 0.44 | -1.71 | .088 | -0.19 [-0.42, 0.03]  |
| semantic, cross-channel congruent (female vs. male) | 0.41  | 0.55 | 0.75  | .455 | 0.08 [-0.14, 0.31]   |
| semantic, semantic incongruent (female vs. male)    | -0.01 | 0.28 | -0.02 | .981 | -0.002 [-0.22, 0.22] |
| semantic, prosodic incongruent (female vs. male)    | -0.08 | 0.28 | -0.29 | .770 | -0.03 [-0.25, 0.19]  |
| semantic, facial incongruent (female vs. male)      | 0.11  | 0.48 | 0.23  | .818 | 0.03 [-0.20, 0.25]   |

---

*Note.* The female participants, the facial task, and the cross-channel congruent condition were used as the default level of gender, task, and congruence respectively. When conducting a pairwise comparison between prosodic and semantic tasks, prosody was set as the baseline level.
